# Supplementary material for: Life cycle environmental impacts and costs of beer production and consumption in the UK
Source: Springer Nature journal article supplement (doi:10.1007/s11367-016-1028-6), 2016-02-02
Supplement: MOESM1 [file 7435530]

# Life Cycle Environmental Impacts and Costs of Beer Production and Consumption in the UK

David Amienyo and Adisa Azapagic

## Supplementary information: Data quality assessment

### S1 Methodology

Data quality assessment has been carried out following the CCaLC methodology (CCaLC, 2014) as an indication of the level of confidence in the results. This methodology considers the following criteria for the LCA and LCC data (see Table S1):

- age;
- geographical origin;
- source;
- completeness; and
- reproducibility, reliability and consistency.

Depending on the above, the quality of data is defined as:

- high;
- medium; or
- low.

Table S2 shows how the criteria in Table S1 can be aggregated to arrive at an overall Data Quality Indicator (DQI) - high, medium or low. For these purposes, each data quality criterion is assigned a weight of importance on a scale of 1-10. For example, as shown in Table S2, "Age of data" has the weight of 2, being twice as important as the geographical origin of data. Each data quality indicator is assigned (an arbitrary) maximum score for each criterion: e.g. the 'high' quality has a score of 3, 'medium' has 2 and 'low' has a score of 1 (see Table S2). Applying the weights of importance for each criterion and its maximum score for the respective quality indicators, the maximum score for each quality indicator is:

- 10 for low;
- 20 for medium; and
- 30 for high.

The following score ranges are adopted to indicate the quality of data:

- low: score in the range of 1-10;
- medium: score in the range of 11-20; and
- high: score range of 21-30.

It should be noted that the overall data quality will depend on both the quality of the particular datasets used as well as on the confidence on the quantity/amount of environmental burdens or costs for each part of the system.

The approach used for calculating DQI for a sub-system is shown in Table S3. Note that the quantity/amount is considered more important here than the quality of the dataset.

Once the data quality indicators have been calculated for each part of the system, a weighted approach is then applied for assessing the overall data quality of the whole system based on the percentage contribution of each life cycle stage to the life cycle impacts or costs. The overall data quality for the whole system is, therefore, calculated as:

$$DQ_{CF} = \sum_{n=1}^N I_n \left( \sum_{m=1}^M DQS_m \right) \quad (S1)$$

where:

$DQ_{CF}$  - overall data quality of the system

$I_n$  – percentage contribution of each life cycle stage to the total impacts or costs (%)

$DQS_m$  – data quality (1, 2 or 3) for sub-system  $m$ .

The following ranges have been adopted for the overall data quality of the whole system:

- low data quality:  $DQ_{CF} = 100 - 166$ ;
- medium data quality:  $DQ_{CF} = 167 - 233$ ; and
- high overall data quality:  $DQ_{CF} = 234 - 300$ .

The above approach has been followed for both the LCA and LCC data quality analyses.

**Table S1 Matrix of data quality indicators (CCaLC, 2014)**

| Data quality criteria                                | Data quality indicators                                                               |                                                                                          |                                                                                       |
|------------------------------------------------------|---------------------------------------------------------------------------------------|------------------------------------------------------------------------------------------|---------------------------------------------------------------------------------------|
|                                                      | High                                                                                  | Medium                                                                                   | Low                                                                                   |
| Age of data                                          | < 5 years                                                                             | 5 – 10 years                                                                             | > 10 years                                                                            |
| Geographical origin of data                          | Specific                                                                              | Partly specific                                                                          | Generic/average                                                                       |
| Source of data                                       | Measured and/or modelled based on specific data (e.g. company data or from suppliers) | Modelled using generic data from LCA databases; some data derived using expert knowledge | Mainly sourced from literature and/or estimated and/or derived using expert knowledge |
| Completeness of data                                 | All inputs and outputs considered                                                     | Majority of relevant inputs and outputs considered                                       | Some relevant inputs and outputs considered or known                                  |
| Reproducibility, reliability and consistency of data | Completely reproducible/reliable/consistent                                           | Partly reproducible/reliable/consistent                                                  | Not reproducible/reliable/not known                                                   |

**Table S2 Aggregating individual data quality indicators to arrive at an overall DQI for each process (CCaLC, 2014)**

| Data quality criteria                   | Weighting for each criterion on a scale of 1 – 10 <sup>a</sup> | High quality<br>Max score for each criterion:<br>3                    | Medium quality<br>Max score for each criterion:<br>2                    | Low quality<br>Max score for each criterion:<br>1                   | Example data quality assessment                                    |
|-----------------------------------------|----------------------------------------------------------------|-----------------------------------------------------------------------|-------------------------------------------------------------------------|---------------------------------------------------------------------|--------------------------------------------------------------------|
| Age                                     | 2                                                              | 3                                                                     | 2                                                                       | 1                                                                   | 1 (Low)                                                            |
| Geographical origin                     | 1                                                              | 3                                                                     | 2                                                                       | 1                                                                   | 3 (High)                                                           |
| Source                                  | 3                                                              | 3                                                                     | 2                                                                       | 1                                                                   | 2 (Medium)                                                         |
| Completeness                            | 2                                                              | 3                                                                     | 2                                                                       | 1                                                                   | 3 (High)                                                           |
| Reproducibility/reliability/consistency | 2                                                              | 3                                                                     | 2                                                                       | 1                                                                   | 1 (Low)                                                            |
| <b>Maximum score</b>                    |                                                                | <b>30 (max score)</b><br>Overall score for High in the range: 21 – 30 | <b>20 (max score)</b><br>Overall score for Medium in the range: 11 – 20 | <b>10 (max score)</b><br>Overall score for Low in the range: 1 – 10 | <b>19 (overall score)</b><br><b>Data quality indicator: Medium</b> |

<sup>a</sup>The sum of all weights is 10.

**Table S3 Aggregating the data quality indicators to arrive at an overall DQI for each sub-system or life cycle stage**

| <b>DQI for LCI/LCC dataset</b> | <b>DQI for the amount entered by the user</b> | <b>Data quality of each sub-system of life cycle stage</b> |
|--------------------------------|-----------------------------------------------|------------------------------------------------------------|
| High                           | High                                          | High (3)                                                   |
| Medium                         | High                                          | Medium (2)                                                 |
| Low                            | High                                          | Medium (2)                                                 |
| High                           | Medium                                        | Medium (2)                                                 |
| Medium                         | Medium                                        | Medium (2)                                                 |
| Low                            | Medium                                        | Low (1)                                                    |
| High                           | Low                                           | Medium (2)                                                 |
| Medium                         | Low                                           | Low (1)                                                    |
| Low                            | Low                                           | Low (1)                                                    |

## S2 Data quality assessment for LCA

Table S4 Beer in glass bottle

| Raw materials                                                            |                             |                           |           |        |              |                 |                  |             |                    |     |           |        |              |                 |                  |             |             |   |
|--------------------------------------------------------------------------|-----------------------------|---------------------------|-----------|--------|--------------|-----------------|------------------|-------------|--------------------|-----|-----------|--------|--------------|-----------------|------------------|-------------|-------------|---|
|                                                                          |                             | Data quality for amount   |           |        |              |                 |                  |             | LCI data quality   |     |           |        |              |                 |                  |             |             |   |
|                                                                          |                             | 2                         | 1         | 3      | 2            | 2               |                  |             | 2                  | 1   | 3         | 2      | 2            |                 |                  |             |             |   |
| Raw materials                                                            | Source of data for amount   | Age                       | Geography | Source | Completeness | Reproducibility | DQA for amount   | Qualitative | Source of LCI data | Age | Geography | Source | Completeness | Reproducibility | DQA for LCI data | Qualitative | Process DQA |   |
| Light fuel oil                                                           | Manufacturer                | 3                         | 2         | 3      | 3            | 3               | 29               | High        | Ecoinvent (2010)   | 3   | 2         | 3      | 3            | 3               | 29               | High        | High        | 3 |
| Water                                                                    | Manufacturer                | 3                         | 2         | 3      | 3            | 3               | 29               | High        | Ecoinvent (2010)   | 3   | 2         | 3      | 3            | 3               | 29               | High        | High        | 3 |
| Diatomaceous earth                                                       | Manufacturer                | 3                         | 2         | 3      | 3            | 3               | 29               | High        | Ecoinvent (2010)   | 3   | 2         | 3      | 3            | 3               | 29               | High        | High        | 3 |
| Sodium hydroxide (50%)                                                   | Manufacturer                | 3                         | 2         | 3      | 3            | 3               | 29               | High        | Ecoinvent (2010)   | 3   | 2         | 3      | 3            | 3               | 29               | High        | High        | 3 |
| Phosphoric acid (75%)                                                    | Manufacturer                | 3                         | 2         | 3      | 3            | 3               | 29               | High        | Ecoinvent (2010)   | 3   | 2         | 3      | 3            | 3               | 29               | High        | High        | 3 |
| Sulphuric acid (63% in water)                                            | Manufacturer                | 3                         | 2         | 3      | 3            | 3               | 29               | High        | Ecoinvent (2010)   | 3   | 2         | 3      | 3            | 3               | 29               | High        | High        | 3 |
| Carbon dioxide, liquid                                                   | Manufacturer                | 3                         | 2         | 3      | 3            | 3               | 29               | High        | Ecoinvent (2010)   | 3   | 2         | 3      | 3            | 3               | 29               | High        | High        | 3 |
| Barley                                                                   | Manufacturer                | 3                         | 2         | 3      | 3            | 3               | 29               | High        | Ecoinvent (2010)   | 3   | 2         | 3      | 3            | 3               | 29               | High        | High        | 3 |
| Water (barley product)                                                   | Ecoinvent (2010)            | 3                         | 2         | 3      | 3            | 3               | 29               | High        | Ecoinvent (2010)   | 3   | 2         | 3      | 3            | 3               | 29               | High        | High        | 3 |
| <b>Subsystem DQA</b>                                                     |                             |                           |           |        |              |                 |                  |             |                    |     |           |        |              |                 |                  |             |             |   |
| High (3)                                                                 |                             |                           |           |        |              |                 |                  |             |                    |     |           |        |              |                 |                  |             |             |   |
| Packaging                                                                |                             |                           |           |        |              |                 |                  |             |                    |     |           |        |              |                 |                  |             |             |   |
|                                                                          |                             | Data quality for amount   |           |        |              |                 |                  |             | LCI data quality   |     |           |        |              |                 |                  |             |             |   |
|                                                                          |                             | 2                         | 1         | 3      | 2            | 2               |                  |             | 2                  | 1   | 3         | 2      | 2            |                 |                  |             |             |   |
| Primary packaging type                                                   | Source of data for amount   | Age                       | Geography | Source | Completeness | Reproducibility | DQA for amount   | Qualitative | Source of LCI data | Age | Geography | Source | Completeness | Reproducibility | DQA for LCI data | Qualitative | Process DQA |   |
| Bottle glass, green                                                      | Manufacturer                | 3                         | 2         | 3      | 3            | 3               | 29               | High        | CCaLC (2010)       | 3   | 3         | 3      | 3            | 3               | 30               | High        | High        | 3 |
| Steel                                                                    | Manufacturer                | 3                         | 2         | 3      | 3            | 3               | 29               | High        | CCaLC (2010)       | 3   | 3         | 3      | 3            | 3               | 30               | High        | High        | 3 |
| Paperboard                                                               | Manufacturer                | 3                         | 2         | 3      | 3            | 3               | 29               | High        | Ecoinvent (2010)   | 3   | 2         | 3      | 3            | 3               | 29               | High        | High        | 3 |
| <b>Subsystem DQA</b>                                                     |                             |                           |           |        |              |                 |                  |             |                    |     |           |        |              |                 |                  |             |             |   |
| High (3)                                                                 |                             |                           |           |        |              |                 |                  |             |                    |     |           |        |              |                 |                  |             |             |   |
| Manufacturing                                                            |                             |                           |           |        |              |                 |                  |             |                    |     |           |        |              |                 |                  |             |             |   |
|                                                                          |                             | Data quality for amount   |           |        |              |                 |                  |             | LCI data quality   |     |           |        |              |                 |                  |             |             |   |
|                                                                          |                             | 2                         | 1         | 3      | 2            | 2               |                  |             | 2                  | 1   | 3         | 2      | 2            |                 |                  |             |             |   |
| Electricity                                                              | Source of data for amount   | Age                       | Geography | Source | Completeness | Reproducibility | DQA for amount   | Qualitative | Source of LCI data | Age | Geography | Source | Completeness | Reproducibility | DQA for LCI data | Qualitative | Process DQA |   |
| Electricity (UK grid, medium voltage)                                    | Manufacturer                | 3                         | 2         | 3      | 3            | 3               | 29               | High        | Ecoinvent (2010)   | 3   | 3         | 3      | 3            | 3               | 30               | High        | High        | 3 |
| <b>Subsystem DQA</b>                                                     |                             |                           |           |        |              |                 |                  |             |                    |     |           |        |              |                 |                  |             |             |   |
| High (3)                                                                 |                             |                           |           |        |              |                 |                  |             |                    |     |           |        |              |                 |                  |             |             |   |
| Waste management                                                         |                             |                           |           |        |              |                 |                  |             |                    |     |           |        |              |                 |                  |             |             |   |
|                                                                          |                             | Data quality for amount   |           |        |              |                 |                  |             | LCI data quality   |     |           |        |              |                 |                  |             |             |   |
|                                                                          |                             | 2                         | 1         | 3      | 2            | 2               |                  |             | 2                  | 1   | 3         | 2      | 2            |                 |                  |             |             |   |
| Waste                                                                    | Source of data for amount   | Age                       | Geography | Source | Completeness | Reproducibility | DQA for amount   | Qualitative | Source of LCI data | Age | Geography | Source | Completeness | Reproducibility | DQA for LCI data | Qualitative | Process DQA |   |
| Wastewater (to wastewater treatment plant)                               | Manufacturer                | 3                         | 2         | 3      | 3            | 3               | 29               | High        | PE (2010)          | 3   | 2         | 3      | 3            | 3               | 29               | High        | High        | 3 |
| Paperboard (to landfill)                                                 | Manufacturer                | 3                         | 2         | 3      | 3            | 3               | 29               | High        | PE (2010)          | 2   | 2         | 3      | 3            | 3               | 27               | High        | High        | 3 |
| Glass (to landfill)                                                      | Manufacturer                | 3                         | 2         | 3      | 3            | 3               | 29               | High        | ELCD/PE (2010)     | 3   | 2         | 3      | 3            | 3               | 29               | High        | High        | 3 |
| Steel (to landfill)                                                      | Manufacturer                | 3                         | 2         | 3      | 3            | 3               | 29               | High        | PE (2010)          | 3   | 2         | 3      | 3            | 3               | 29               | High        | High        | 3 |
| <b>Subsystem DQA</b>                                                     |                             |                           |           |        |              |                 |                  |             |                    |     |           |        |              |                 |                  |             |             |   |
| High (3)                                                                 |                             |                           |           |        |              |                 |                  |             |                    |     |           |        |              |                 |                  |             |             |   |
| Transport                                                                |                             |                           |           |        |              |                 |                  |             |                    |     |           |        |              |                 |                  |             |             |   |
|                                                                          |                             | Data quality for distance |           |        |              |                 |                  |             | LCI data quality   |     |           |        |              |                 |                  |             |             |   |
|                                                                          |                             | 2                         | 1         | 3      | 2            | 2               |                  |             | 2                  | 1   | 3         | 2      | 2            |                 |                  |             |             |   |
| Material                                                                 | Source of data for distance | Age                       | Geography | Source | Completeness | Reproducibility | DQA for distance | Qualitative | Source of LCI data | Age | Geography | Source | Completeness | Reproducibility | DQA for LCI data | Qualitative | Process DQA |   |
| Barley malt (40 t truck)                                                 | Manufacturer                | 3                         | 2         | 3      | 3            | 3               | 29               | High        | PE (2010)          | 3   | 2         | 3      | 3            | 3               | 29               | High        | High        | 3 |
| Primary packaging (3 t truck)                                            | Manufacturer                | 3                         | 2         | 3      | 3            | 3               | 29               | High        | PE (2010)          | 3   | 2         | 3      | 3            | 3               | 29               | High        | High        | 3 |
| Packaged product to brewery                                              | Manufacturer                | 3                         | 2         | 3      | 3            | 3               | 29               | High        | PE (2010)          | 3   | 2         | 3      | 3            | 3               | 29               | High        | High        | 3 |
| <b>Subsystem DQA</b>                                                     |                             |                           |           |        |              |                 |                  |             |                    |     |           |        |              |                 |                  |             |             |   |
| High (3)                                                                 |                             |                           |           |        |              |                 |                  |             |                    |     |           |        |              |                 |                  |             |             |   |
| DQA for system                                                           |                             |                           |           |        |              |                 |                  |             |                    |     |           |        |              |                 |                  |             |             |   |
| 42(3) + 45(3) + 8(3) + 3(3) + 2(3) = 300 (High)                          |                             |                           |           |        |              |                 |                  |             |                    |     |           |        |              |                 |                  |             |             |   |
| Life cycle stage (subsystem) contribution to total environmental impacts |                             |                           |           |        |              |                 |                  |             |                    |     |           |        |              |                 |                  |             |             |   |
| Key                                                                      | Life cycle                  | Contribution              |           |        |              |                 |                  |             |                    |     |           |        |              |                 |                  |             |             |   |
| Raw materials                                                            | 42%                         | 42%                       |           |        |              |                 |                  |             |                    |     |           |        |              |                 |                  |             |             |   |
| Packaging                                                                | 45%                         | 45%                       |           |        |              |                 |                  |             |                    |     |           |        |              |                 |                  |             |             |   |
| Manufacturing                                                            | 8%                          | 8%                        |           |        |              |                 |                  |             |                    |     |           |        |              |                 |                  |             |             |   |
| Waste management                                                         | 3%                          | 3%                        |           |        |              |                 |                  |             |                    |     |           |        |              |                 |                  |             |             |   |
| Transport                                                                | 2%                          | 2%                        |           |        |              |                 |                  |             |                    |     |           |        |              |                 |                  |             |             |   |
| Total                                                                    | 100%                        | 100%                      |           |        |              |                 |                  |             |                    |     |           |        |              |                 |                  |             |             |   |

**Table S5 Aluminium can system**

| Raw materials                                   |                             |                  |           |              |                                                                          |                 |                  |             |                    |                  |           |        |              |                 |                  |             |             |   |
|-------------------------------------------------|-----------------------------|------------------|-----------|--------------|--------------------------------------------------------------------------|-----------------|------------------|-------------|--------------------|------------------|-----------|--------|--------------|-----------------|------------------|-------------|-------------|---|
| Data quality for amount                         |                             |                  |           |              |                                                                          |                 |                  |             |                    | LCI data quality |           |        |              |                 |                  |             |             |   |
|                                                 |                             | 2                | 1         | 3            | 2                                                                        | 2               |                  |             |                    | 2                | 1         | 3      | 2            | 2               |                  |             |             |   |
| Raw materials                                   | Source of data for amount   | Age              | Geography | Source       | Completeness                                                             | Reproducibility | DQA for amount   | Qualitative | Source of LCI data | Age              | Geography | Source | Completeness | Reproducibility | DQA for LCI data | Qualitative | Process DQA |   |
| Light fuel oil                                  | Manufacturer                | 3                | 2         | 3            | 3                                                                        | 3               | 29               | High        | Ecoinvent (2010)   | 3                | 2         | 3      | 3            | 3               | 29               | High        | High        | 3 |
| Water                                           | Manufacturer                | 3                | 2         | 3            | 3                                                                        | 3               | 29               | High        | Ecoinvent (2010)   | 3                | 2         | 3      | 3            | 3               | 29               | High        | High        | 3 |
| Diatomaceous earth                              | Manufacturer                | 3                | 2         | 3            | 3                                                                        | 3               | 29               | High        | Ecoinvent (2010)   | 3                | 2         | 3      | 3            | 3               | 29               | High        | High        | 3 |
| Sodium hydroxide (50%)                          | Manufacturer                | 3                | 2         | 3            | 3                                                                        | 3               | 29               | High        | Ecoinvent (2010)   | 3                | 2         | 3      | 3            | 3               | 29               | High        | High        | 3 |
| Phosphoric acid (75%)                           | Manufacturer                | 3                | 2         | 3            | 3                                                                        | 3               | 29               | High        | Ecoinvent (2010)   | 3                | 2         | 3      | 3            | 3               | 29               | High        | High        | 3 |
| Sulphuric acid (63% aq)                         | Manufacturer                | 3                | 2         | 3            | 3                                                                        | 3               | 29               | High        | Ecoinvent (2010)   | 3                | 2         | 3      | 3            | 3               | 29               | High        | High        | 3 |
| Carbon dioxide, liquid                          | Manufacturer                | 3                | 2         | 3            | 3                                                                        | 3               | 29               | High        | Ecoinvent (2010)   | 3                | 2         | 3      | 3            | 3               | 29               | High        | High        | 3 |
| Barley                                          | Manufacturer                | 3                | 2         | 3            | 3                                                                        | 3               | 29               | High        | Ecoinvent (2010)   | 3                | 2         | 3      | 3            | 3               | 29               | High        | High        | 3 |
| Water (barley product)                          | Ecoinvent (2010)            | 3                | 2         | 3            | 3                                                                        | 3               | 29               | High        | Ecoinvent (2010)   | 3                | 2         | 3      | 3            | 3               | 29               | High        | High        | 3 |
| Subsystem DQA                                   |                             |                  |           |              |                                                                          |                 |                  |             |                    |                  |           |        |              |                 |                  |             | High (3)    |   |
| Packaging                                       |                             |                  |           |              |                                                                          |                 |                  |             |                    |                  |           |        |              |                 |                  |             |             |   |
| Data quality for amount                         |                             |                  |           |              |                                                                          |                 |                  |             |                    | LCI data quality |           |        |              |                 |                  |             |             |   |
|                                                 |                             | 2                | 1         | 3            | 2                                                                        | 2               |                  |             |                    | 2                | 1         | 3      | 2            | 2               |                  |             |             |   |
| Primary packaging type                          | Source of data for amount   | Age              | Geography | Source       | Completeness                                                             | Reproducibility | DQA for amount   | Qualitative | Source of LCI data | Age              | Geography | Source | Completeness | Reproducibility | DQA for LCI data | Qualitative | Process DQA |   |
| Aluminium can                                   | Literature                  | 3                | 3         | 2            | 3                                                                        | 3               | 27               | High        | CCaLC (2010)       | 3                | 3         | 3      | 3            | 3               | 30               | High        | High        | 3 |
| Subsystem DQA                                   |                             |                  |           |              |                                                                          |                 |                  |             |                    |                  |           |        |              |                 |                  |             | High (3)    |   |
| Manufacturing                                   |                             |                  |           |              |                                                                          |                 |                  |             |                    |                  |           |        |              |                 |                  |             |             |   |
| Data quality for amount                         |                             |                  |           |              |                                                                          |                 |                  |             |                    | LCI data quality |           |        |              |                 |                  |             |             |   |
|                                                 |                             | 2                | 1         | 3            | 2                                                                        | 2               |                  |             |                    | 2                | 1         | 3      | 2            | 2               |                  |             |             |   |
| Electricity                                     | Source of data for amount   | Age              | Geography | Source       | Completeness                                                             | Reproducibility | DQA for amount   | Qualitative | Source of LCI data | Age              | Geography | Source | Completeness | Reproducibility | DQA for LCI data | Qualitative | Process DQA |   |
| Electricity (UK grid, national average)         | Manufacturer                | 3                | 2         | 3            | 3                                                                        | 3               | 29               | High        | Ecoinvent (2010)   | 3                | 3         | 3      | 3            | 3               | 30               | High        | High        | 3 |
| Subsystem DQA                                   |                             |                  |           |              |                                                                          |                 |                  |             |                    |                  |           |        |              |                 |                  |             | High (3)    |   |
| Waste management                                |                             |                  |           |              |                                                                          |                 |                  |             |                    |                  |           |        |              |                 |                  |             |             |   |
| Data quality for amount                         |                             |                  |           |              |                                                                          |                 |                  |             |                    | LCI data quality |           |        |              |                 |                  |             |             |   |
|                                                 |                             | 2                | 1         | 3            | 2                                                                        | 2               |                  |             |                    | 2                | 1         | 3      | 2            | 2               |                  |             |             |   |
| Waste                                           | Source of data for amount   | Age              | Geography | Source       | Completeness                                                             | Reproducibility | DQA for amount   | Qualitative | Source of LCI data | Age              | Geography | Source | Completeness | Reproducibility | DQA for LCI data | Qualitative | Process DQA |   |
| Wastewater (to wastewater treatment plant)      | Manufacturer                | 3                | 2         | 3            | 3                                                                        | 3               | 29               | High        | PE (2010)          | 3                | 2         | 3      | 3            | 3               | 29               | High        | High        | 3 |
| Aluminium (to landfill)                         | Literature                  | 3                | 2         | 2            | 3                                                                        | 3               | 26               | High        | PE (2010)          | 3                | 2         | 3      | 3            | 3               | 29               | High        | High        | 3 |
| Subsystem DQA                                   |                             |                  |           |              |                                                                          |                 |                  |             |                    |                  |           |        |              |                 |                  |             | High (3)    |   |
| Transport                                       |                             |                  |           |              |                                                                          |                 |                  |             |                    |                  |           |        |              |                 |                  |             |             |   |
| Data quality for distance                       |                             |                  |           |              |                                                                          |                 |                  |             |                    | LCI data quality |           |        |              |                 |                  |             |             |   |
|                                                 |                             | 2                | 1         | 3            | 2                                                                        | 2               |                  |             |                    | 2                | 1         | 3      | 2            | 2               |                  |             |             |   |
| Material                                        | Source of data for distance | Age              | Geography | Source       | Completeness                                                             | Reproducibility | DQA for distance | Qualitative | Source of LCI data | Age              | Geography | Source | Completeness | Reproducibility | DQA for LCI data | Qualitative | Process DQA |   |
| Barley malt (40 t truck)                        | Manufacturer                | 3                | 2         | 3            | 3                                                                        | 3               | 29               | High        | PE (2010)          | 3                | 2         | 3      | 3            | 3               | 29               | High        | High        | 3 |
| Primary packaging (30 t truck)                  | Manufacturer                | 3                | 2         | 3            | 3                                                                        | 3               | 29               | High        | PE (2010)          | 3                | 2         | 3      | 3            | 3               | 29               | High        | High        | 3 |
| Packaged product to distribution centre         | Manufacturer                | 3                | 2         | 3            | 3                                                                        | 3               | 29               | High        | PE (2010)          | 3                | 2         | 3      | 3            | 3               | 29               | High        | High        | 3 |
| Subsystem DQA                                   |                             |                  |           |              |                                                                          |                 |                  |             |                    |                  |           |        |              |                 |                  |             | High (3)    |   |
| DQA for system                                  |                             |                  |           |              |                                                                          |                 |                  |             |                    |                  |           |        |              |                 |                  |             |             |   |
| 55(3) + 33(3) + 9(3) + 2(3) + 1(3) = 300 (High) |                             |                  |           |              | Life cycle stage (subsystem) contribution to total environmental impacts |                 |                  |             |                    |                  |           |        |              |                 |                  |             |             |   |
| Key                                             |                             | Life cycle stage |           | Contribution |                                                                          |                 |                  |             |                    |                  |           |        |              |                 |                  |             |             |   |
| Subsystem                                       |                             | Raw materials    |           | 55%          |                                                                          |                 |                  |             |                    |                  |           |        |              |                 |                  |             |             |   |
| Weighting factor                                |                             | Packaging        |           | 33%          |                                                                          |                 |                  |             |                    |                  |           |        |              |                 |                  |             |             |   |
| Data quality for process                        |                             | Manufacturing    |           | 9%           |                                                                          |                 |                  |             |                    |                  |           |        |              |                 |                  |             |             |   |
| Data quality for subsystem                      |                             | Waste management |           | 2%           |                                                                          |                 |                  |             |                    |                  |           |        |              |                 |                  |             |             |   |
| Data quality for system                         |                             | Transport        |           | 1%           |                                                                          |                 |                  |             |                    |                  |           |        |              |                 |                  |             |             |   |
|                                                 |                             | Total            |           | 100%         |                                                                          |                 |                  |             |                    |                  |           |        |              |                 |                  |             |             |   |

**Table S6 Steel can system**

| Raw materials                                    |                    |            |           |              |           |           |            |             |                    |                                                                          |           |        |           |           |            |             |             |               |          |
|--------------------------------------------------|--------------------|------------|-----------|--------------|-----------|-----------|------------|-------------|--------------------|--------------------------------------------------------------------------|-----------|--------|-----------|-----------|------------|-------------|-------------|---------------|----------|
| Data quality for amount                          |                    |            |           |              |           |           |            |             |                    | LCI data quality                                                         |           |        |           |           |            |             |             |               |          |
|                                                  |                    | 2          | 1         | 3            | 2         | 2         |            |             |                    | 2                                                                        | 1         | 3      | 2         | 2         |            |             |             |               |          |
| Raw materials                                    | Source of data for | Age        | Geography | Source       | Completer | Reproduci | DQA for ar | Qualitative | Source of LCI data | Age                                                                      | Geography | Source | Completer | Reproduci | DQA for LC | Qualitative | Process DQA |               |          |
| Light fuel oil                                   | Manufacturer       | 3          | 2         | 3            | 3         | 3         | 29         | High        | Ecoinvent (2010)   | 3                                                                        | 2         | 3      | 3         | 3         | 29         | High        | High        | 3             |          |
| Water                                            | Manufacturer       | 3          | 2         | 3            | 3         | 3         | 29         | High        | Ecoinvent (2010)   | 3                                                                        | 2         | 3      | 3         | 3         | 29         | High        | High        | 3             |          |
| Diatomaceous earth                               | Manufacturer       | 3          | 2         | 3            | 3         | 3         | 29         | High        | Ecoinvent (2010)   | 3                                                                        | 2         | 3      | 3         | 3         | 29         | High        | High        | 3             |          |
| Sodium hydroxide (50%)                           | Manufacturer       | 3          | 2         | 3            | 3         | 3         | 29         | High        | Ecoinvent (2010)   | 3                                                                        | 2         | 3      | 3         | 3         | 29         | High        | High        | 3             |          |
| Phosphoric acid (75%)                            | Manufacturer       | 3          | 2         | 3            | 3         | 3         | 29         | High        | Ecoinvent (2010)   | 3                                                                        | 2         | 3      | 3         | 3         | 29         | High        | High        | 3             |          |
| Sulphuric acid (63% i)                           | Manufacturer       | 3          | 2         | 3            | 3         | 3         | 29         | High        | Ecoinvent (2010)   | 3                                                                        | 2         | 3      | 3         | 3         | 29         | High        | High        | 3             |          |
| Carbon dioxide, liquid                           | Manufacturer       | 3          | 2         | 3            | 3         | 3         | 29         | High        | Ecoinvent (2010)   | 3                                                                        | 2         | 3      | 3         | 3         | 29         | High        | High        | 3             |          |
| Barley                                           | Manufacturer       | 3          | 2         | 3            | 3         | 3         | 29         | High        | Ecoinvent (2010)   | 3                                                                        | 2         | 3      | 3         | 3         | 29         | High        | High        | 3             |          |
| Water (barley product)                           | Ecoinvent (2010)   | 3          | 2         | 3            | 3         | 3         | 29         | High        | Ecoinvent (2010)   | 3                                                                        | 2         | 3      | 3         | 3         | 29         | High        | High        | 3             |          |
|                                                  |                    |            |           |              |           |           |            |             |                    |                                                                          |           |        |           |           |            |             |             | Subsystem DQA | High (3) |
| Packaging                                        |                    |            |           |              |           |           |            |             |                    |                                                                          |           |        |           |           |            |             |             |               |          |
| Data quality for amount                          |                    |            |           |              |           |           |            |             |                    | LCI data quality                                                         |           |        |           |           |            |             |             |               |          |
|                                                  |                    | 2          | 1         | 3            | 2         | 2         |            |             |                    | 2                                                                        | 1         | 3      | 2         | 2         |            |             |             |               |          |
| Primary packaging type                           | Source of data for | Age        | Geography | Source       | Completer | Reproduci | DQA for ar | Qualitative | Source of LCI data | Age                                                                      | Geography | Source | Completer | Reproduci | DQA for LC | Qualitative | Process DQA |               |          |
| Steel can                                        | Literature         | 3          | 3         | 3            | 3         | 3         | 30         | High        | CCaLC (2010)       | 3                                                                        | 3         | 3      | 3         | 3         | 30         | High        | High        | 3             |          |
|                                                  |                    |            |           |              |           |           |            |             |                    |                                                                          |           |        |           |           |            |             |             | Subsystem DQA | High (3) |
| Manufacturing                                    |                    |            |           |              |           |           |            |             |                    |                                                                          |           |        |           |           |            |             |             |               |          |
| Data quality for amount                          |                    |            |           |              |           |           |            |             |                    | LCI data quality                                                         |           |        |           |           |            |             |             |               |          |
|                                                  |                    | 2          | 1         | 3            | 2         | 2         |            |             |                    | 2                                                                        | 1         | 3      | 2         | 2         |            |             |             |               |          |
| Electricity                                      | Source of data for | Age        | Geography | Source       | Completer | Reproduci | DQA for ar | Qualitative | Source of LCI data | Age                                                                      | Geography | Source | Completer | Reproduci | DQA for LC | Qualitative | Process DQA |               |          |
| Electricity (UK grid, m)                         | Manufacturer       | 3          | 2         | 3            | 3         | 3         | 29         | High        | Ecoinvent (2010)   | 3                                                                        | 3         | 3      | 3         | 3         | 30         | High        | High        | 3             |          |
|                                                  |                    |            |           |              |           |           |            |             |                    |                                                                          |           |        |           |           |            |             |             | Subsystem DQA | High (3) |
| Waste management                                 |                    |            |           |              |           |           |            |             |                    |                                                                          |           |        |           |           |            |             |             |               |          |
| Data quality for amount                          |                    |            |           |              |           |           |            |             |                    | LCI data quality                                                         |           |        |           |           |            |             |             |               |          |
|                                                  |                    | 2          | 1         | 3            | 2         | 2         |            |             |                    | 2                                                                        | 1         | 3      | 2         | 2         |            |             |             |               |          |
| Waste                                            | Source of data for | Age        | Geography | Source       | Completer | Reproduci | DQA for ar | Qualitative | Source of LCI data | Age                                                                      | Geography | Source | Completer | Reproduci | DQA for LC | Qualitative | Process DQA |               |          |
| Wastewater (to waste)                            | Manufacturer       | 3          | 2         | 3            | 3         | 3         | 29         | High        | PE (2010)          | 3                                                                        | 2         | 3      | 3         | 3         | 29         | High        | High        | 3             |          |
| Steel (to landfill)                              | Literature         | 3          | 2         | 2            | 3         | 3         | 26         | High        | PE (2010)          | 3                                                                        | 2         | 3      | 3         | 3         | 29         | High        | High        | 3             |          |
|                                                  |                    |            |           |              |           |           |            |             |                    |                                                                          |           |        |           |           |            |             |             | Subsystem DQA | High (3) |
| Transport                                        |                    |            |           |              |           |           |            |             |                    |                                                                          |           |        |           |           |            |             |             |               |          |
| Data quality for distance                        |                    |            |           |              |           |           |            |             |                    | LCI data quality                                                         |           |        |           |           |            |             |             |               |          |
|                                                  |                    | 2          | 1         | 3            | 2         | 2         |            |             |                    | 2                                                                        | 1         | 3      | 2         | 2         |            |             |             |               |          |
| Material                                         | Source of data for | Age        | Geography | Source       | Completer | Reproduci | DQA for ar | Qualitative | Source of LCI data | Age                                                                      | Geography | Source | Completer | Reproduci | DQA for LC | Qualitative | Process DQA |               |          |
| Barley malt (40 t truck)                         | Manufacturer       | 3          | 2         | 3            | 3         | 3         | 29         | High        | PE (2010)          | 3                                                                        | 2         | 3      | 3         | 3         | 29         | High        | High        | 3             |          |
| Primary packaging (3)                            | Manufacturer       | 3          | 2         | 3            | 3         | 3         | 29         | High        | PE (2010)          | 3                                                                        | 2         | 3      | 3         | 3         | 29         | High        | High        | 3             |          |
| Packaged product to                              | Manufacturer       | 3          | 2         | 3            | 3         | 3         | 29         | High        | PE (2010)          | 3                                                                        | 2         | 3      | 3         | 3         | 29         | High        | High        | 3             |          |
|                                                  |                    |            |           |              |           |           |            |             |                    |                                                                          |           |        |           |           |            |             |             | Subsystem DQA | High (3) |
| DQA for system                                   |                    |            |           |              |           |           |            |             |                    |                                                                          |           |        |           |           |            |             |             |               |          |
| 60(3) + 21(3) + 15(3) + 3(3) + 1(3) = 300 (High) |                    |            |           |              |           |           |            |             |                    |                                                                          |           |        |           |           |            |             |             |               |          |
|                                                  |                    |            |           |              |           |           |            |             |                    | Life cycle stage (subsystem) contribution to total environmental impacts |           |        |           |           |            |             |             |               |          |
| Key                                              |                    | Life cycle |           | Contribution |           |           |            |             |                    |                                                                          |           |        |           |           |            |             |             |               |          |
| Subsystem                                        |                    | Raw mate   |           | 60%          |           |           |            |             |                    |                                                                          |           |        |           |           |            |             |             |               |          |
| Weighting factor                                 |                    | Packaging  |           | 21%          |           |           |            |             |                    |                                                                          |           |        |           |           |            |             |             |               |          |
| Data quality for process                         |                    | Manufactu  |           | 15%          |           |           |            |             |                    |                                                                          |           |        |           |           |            |             |             |               |          |
| Data quality for subsystem                       |                    | Waste ma   |           | 3%           |           |           |            |             |                    |                                                                          |           |        |           |           |            |             |             |               |          |
| Data quality for system                          |                    | Transport  |           | 1%           |           |           |            |             |                    |                                                                          |           |        |           |           |            |             |             |               |          |
|                                                  |                    | Total      |           | 100%         |           |           |            |             |                    |                                                                          |           |        |           |           |            |             |             |               |          |

### S3 Data quality assessment for LCC

Table S7 Beer in glass bottles

| Raw materials           |                    |     |           |        |           |            |            |             |                          |     |           |        |           |            |            |             |               |            |
|-------------------------|--------------------|-----|-----------|--------|-----------|------------|------------|-------------|--------------------------|-----|-----------|--------|-----------|------------|------------|-------------|---------------|------------|
| Data quality for amount |                    |     |           |        |           |            |            |             | LCC data quality         |     |           |        |           |            |            |             |               |            |
|                         |                    | 2   | 1         | 3      | 2         | 2          |            |             | 2                        | 1   | 3         | 2      | 2         |            |            |             |               |            |
| Raw materials           | Source of data for | Age | Geography | Source | Completer | Reproducit | DQA for ar | Qualitative | Source of LCI data       | Age | Geography | Source | Completer | Reproducit | DQA for LC | Qualitative | Process DQA   |            |
| Light fuel oil          | Manufacturer       | 3   | 2         | 3      | 3         | 3          | 29         | High        | OECD (2007)              | 2   | 1         | 1      | 1         | 1          | 12         | Medium      | Medium 2      |            |
| Water                   | Manufacturer       | 3   | 2         | 3      | 3         | 3          | 29         | High        | United Utilities (2010)  | 3   | 3         | 1      | 1         | 1          | 16         | Medium      | Medium 2      |            |
| Sodium hydroxide (50%)  | Manufacturer       | 3   | 2         | 3      | 3         | 3          | 29         | High        | ICChemE (2002)           | 3   | 1         | 1      | 1         | 1          | 14         | Medium      | Medium 2      |            |
| Phosphoric acid (75%)   | Manufacturer       | 3   | 2         | 3      | 3         | 3          | 29         | High        | ICIS (2010)              | 3   | 1         | 1      | 1         | 1          | 14         | Medium      | Medium 2      |            |
| Sulphuric acid (63% i   | Manufacturer       | 3   | 2         | 3      | 3         | 3          | 29         | High        | ICIS (2010)              | 3   | 1         | 1      | 1         | 1          | 14         | Medium      | Medium 2      |            |
| Carbon dioxide, liquid  | Manufacturer       | 3   | 2         | 3      | 3         | 3          | 29         | High        | Confidential (2009)      | 3   | 1         | 1      | 1         | 1          | 14         | Medium      | Medium 2      |            |
| Barley                  | Manufacturer       | 3   | 2         | 3      | 3         | 3          | 29         | High        | Indexmundi (2011)        | 3   | 1         | 1      | 1         | 1          | 14         | Medium      | Medium 2      |            |
| Water (barley product   | Ecoinvent (2010)   | 3   | 2         | 3      | 3         | 3          | 29         | High        | United Utilities (2010)  | 3   | 3         | 1      | 1         | 1          | 16         | Medium      | Medium 2      |            |
|                         |                    |     |           |        |           |            |            |             |                          |     |           |        |           |            |            |             | 2             |            |
|                         |                    |     |           |        |           |            |            |             |                          |     |           |        |           |            |            |             | Subsystem DQA | Medium (2) |
| Packaging               |                    |     |           |        |           |            |            |             |                          |     |           |        |           |            |            |             |               |            |
| Data quality for amount |                    |     |           |        |           |            |            |             | LCC data quality         |     |           |        |           |            |            |             |               |            |
|                         |                    | 2   | 1         | 3      | 2         | 2          |            |             | 2                        | 1   | 3         | 2      | 2         |            |            |             |               |            |
| Primary packaging ty    | Source of data for | Age | Geography | Source | Completer | Reproducit | DQA for ar | Qualitative | Source of LCI data       | Age | Geography | Source | Completer | Reproducit | DQA for LC | Qualitative | Process DQA   |            |
| Bottle glass, green     | Manufacturer       | 3   | 2         | 3      | 3         | 3          | 29         | High        | Aliexpress (2010)/WRAP   | 3   | 1         | 1      | 1         | 1          | 14         | Medium      | Medium 2      |            |
| Steel                   | Manufacturer       | 3   | 2         | 3      | 3         | 3          | 29         | High        | LME (2011)               | 3   | 1         | 1      | 1         | 1          | 14         | Medium      | Medium 2      |            |
| Paperboard              | Manufacturer       | 3   | 2         | 3      | 3         | 3          | 29         | High        | WRAP (2011)              | 3   | 3         | 1      | 1         | 1          | 16         | Medium      | Medium 2      |            |
|                         |                    |     |           |        |           |            |            |             |                          |     |           |        |           |            |            |             | 2             |            |
|                         |                    |     |           |        |           |            |            |             |                          |     |           |        |           |            |            |             | Subsystem DQA | Medium (2) |
| Manufacturing           |                    |     |           |        |           |            |            |             |                          |     |           |        |           |            |            |             |               |            |
| Data quality for amount |                    |     |           |        |           |            |            |             | LCC data quality         |     |           |        |           |            |            |             |               |            |
|                         |                    | 2   | 1         | 3      | 2         | 2          |            |             | 2                        | 1   | 3         | 2      | 2         |            |            |             |               |            |
| Electricity             | Source of data for | Age | Geography | Source | Completer | Reproducit | DQA for ar | Qualitative | Source of LCI data       | Age | Geography | Source | Completer | Reproducit | DQA for LC | Qualitative | Process DQA   |            |
| Electricity (UK grid, m | Manufacturer       | 3   | 2         | 3      | 3         | 3          | 29         | High        | Electricityprices.org.uk | 3   | 3         | 1      | 1         | 1          | 16         | Medium      | Medium 2      |            |
|                         |                    |     |           |        |           |            |            |             |                          |     |           |        |           |            |            |             | 2             |            |
|                         |                    |     |           |        |           |            |            |             |                          |     |           |        |           |            |            |             | Subsystem DQA | Medium (2) |
| Waste management        |                    |     |           |        |           |            |            |             |                          |     |           |        |           |            |            |             |               |            |
| Data quality for amount |                    |     |           |        |           |            |            |             | LCC data quality         |     |           |        |           |            |            |             |               |            |
|                         |                    | 2   | 1         | 3      | 2         | 2          |            |             | 2                        | 1   | 3         | 2      | 2         |            |            |             |               |            |
| Waste                   | Source of data for | Age | Geography | Source | Completer | Reproducit | DQA for ar | Qualitative | Source of LCI data       | Age | Geography | Source | Completer | Reproducit | DQA for LC | Qualitative | Process DQA   |            |
| Wastewater (to waste    | Manufacturer       | 3   | 2         | 3      | 3         | 3          | 29         | High        | Scottish Water (201)     | 3   | 3         | 1      | 1         | 1          | 16         | Medium      | Medium 2      |            |
| Paperboard (to landfill | Manufacturer       | 3   | 2         | 3      | 3         | 3          | 29         | High        | WRAP (2010)              | 3   | 3         | 1      | 1         | 1          | 16         | Medium      | Medium 2      |            |
| Glass (to landfill)     | Manufacturer       | 3   | 2         | 3      | 3         | 3          | 29         | High        | WRAP (2010)              | 3   | 3         | 1      | 1         | 1          | 16         | Medium      | Medium 2      |            |
| Steel (to landfill)     | Manufacturer       | 3   | 2         | 3      | 3         | 3          | 29         | High        | WRAP (2010)              | 3   | 3         | 1      | 1         | 1          | 16         | Medium      | Medium 2      |            |
|                         |                    |     |           |        |           |            |            |             |                          |     |           |        |           |            |            |             | 2             |            |
|                         |                    |     |           |        |           |            |            |             |                          |     |           |        |           |            |            |             | Subsystem DQA | Medium (2) |

Note: Transport costs are assumed to be included in the material costs therefore Transport has not been considered as a separate life cycle stage in the LCC analysis.

#### DQA for system

$$55(2) + 26(2) + 14(2) + 5(2) = 200 \text{ (Medium)}$$

| Key                        |  |
|----------------------------|--|
| Subsystem                  |  |
| Weighting factor           |  |
| Data quality for process   |  |
| Data quality for subsystem |  |
| Data quality for system    |  |

#### Life cycle stage (subsystem) contribution to total environmental impacts

| Life cycle | Contribution |
|------------|--------------|
| Raw mate   | 55%          |
| Packaging  | 26%          |
| Manufactu  | 14%          |
| Waste ma   | 5%           |
| Total      | 100%         |

**Table S8 Beer in aluminium cans**

| <b>Raw materials</b>                       |                    |                         |           |        |           |            |            |             |                          |     |           |        |           |            |             |             |             |
|--------------------------------------------|--------------------|-------------------------|-----------|--------|-----------|------------|------------|-------------|--------------------------|-----|-----------|--------|-----------|------------|-------------|-------------|-------------|
|                                            |                    | Data quality for amount |           |        |           |            |            |             | LCC data quality         |     |           |        |           |            |             |             |             |
|                                            |                    | 2                       | 1         | 3      | 2         | 2          |            |             | 2                        | 1   | 3         | 2      | 2         |            |             |             |             |
| Raw materials                              | Source of data for | Age                     | Geography | Source | Completer | Reproducit | DQA for ar | Qualitative | Source of LCI data       | Age | Geography | Source | Completer | Reproducit | DQA for LCI | Qualitative | Process DQA |
| Light fuel oil                             | Manufacturer       | 3                       | 2         | 3      | 3         | 3          | 29         | High        | OECD (2007)              | 2   | 1         | 1      | 1         | 1          | 12          | Medium      | Medium 2    |
| Water                                      | Manufacturer       | 3                       | 2         | 3      | 3         | 3          | 29         | High        | United Utilities (2010)  | 3   | 3         | 1      | 1         | 1          | 16          | Medium      | Medium 2    |
| Sodium hydroxide (50%)                     | Manufacturer       | 3                       | 2         | 3      | 3         | 3          | 29         | High        | IChemE (2002)            | 3   | 1         | 1      | 1         | 1          | 14          | Medium      | Medium 2    |
| Phosphoric acid (75%)                      | Manufacturer       | 3                       | 2         | 3      | 3         | 3          | 29         | High        | ICIS (2010)              | 3   | 1         | 1      | 1         | 1          | 14          | Medium      | Medium 2    |
| Sulphuric acid (63% in water)              | Manufacturer       | 3                       | 2         | 3      | 3         | 3          | 29         | High        | ICIS (2010)              | 3   | 1         | 1      | 1         | 1          | 14          | Medium      | Medium 2    |
| Carbon dioxide, liquid                     | Manufacturer       | 3                       | 2         | 3      | 3         | 3          | 29         | High        | Confidential (2009)      | 3   | 1         | 1      | 1         | 1          | 14          | Medium      | Medium 2    |
| Barley                                     | Manufacturer       | 3                       | 2         | 3      | 3         | 3          | 29         | High        | Indexmundi (2011)        | 3   | 1         | 1      | 1         | 1          | 14          | Medium      | Medium 2    |
| Water (barley product)                     | Ecoinvent (2010)   | 3                       | 2         | 3      | 3         | 3          | 29         | High        | United Utilities (2010)  | 3   | 3         | 1      | 1         | 1          | 16          | Medium      | Medium 2    |
| <b>Subsystem DQA</b>                       |                    |                         |           |        |           |            |            |             |                          |     |           |        |           |            |             |             |             |
| 2 Medium (2)                               |                    |                         |           |        |           |            |            |             |                          |     |           |        |           |            |             |             |             |
| <b>Packaging</b>                           |                    |                         |           |        |           |            |            |             |                          |     |           |        |           |            |             |             |             |
|                                            |                    | Data quality for amount |           |        |           |            |            |             | LCC data quality         |     |           |        |           |            |             |             |             |
|                                            |                    | 2                       | 1         | 3      | 2         | 2          |            |             | 2                        | 1   | 3         | 2      | 2         |            |             |             |             |
| Primary packaging type                     | Source of data for | Age                     | Geography | Source | Completer | Reproducit | DQA for ar | Qualitative | Source of LCI data       | Age | Geography | Source | Completer | Reproducit | DQA for LCI | Qualitative | Process DQA |
| Aluminium can                              | CCaLC (2010)       | 3                       | 3         | 2      | 3         | 3          | 27         | High        | LME (2011)/Letsrecycle   | 3   | 1         | 1      | 1         | 1          | 14          | Medium      | Medium 2    |
| <b>Subsystem DQA</b>                       |                    |                         |           |        |           |            |            |             |                          |     |           |        |           |            |             |             |             |
| 2 Medium (2)                               |                    |                         |           |        |           |            |            |             |                          |     |           |        |           |            |             |             |             |
| <b>Manufacturing</b>                       |                    |                         |           |        |           |            |            |             |                          |     |           |        |           |            |             |             |             |
|                                            |                    | Data quality for amount |           |        |           |            |            |             | LCC data quality         |     |           |        |           |            |             |             |             |
|                                            |                    | 2                       | 1         | 3      | 2         | 2          |            |             | 2                        | 1   | 3         | 2      | 2         |            |             |             |             |
| Electricity                                | Source of data for | Age                     | Geography | Source | Completer | Reproducit | DQA for ar | Qualitative | Source of LCI data       | Age | Geography | Source | Completer | Reproducit | DQA for LCI | Qualitative | Process DQA |
| Electricity (UK grid, medium voltage)      | Manufacturer       | 3                       | 2         | 3      | 3         | 3          | 29         | High        | Electricityprices.org.uk | 3   | 3         | 1      | 1         | 1          | 16          | Medium      | Medium 2    |
| <b>Subsystem DQA</b>                       |                    |                         |           |        |           |            |            |             |                          |     |           |        |           |            |             |             |             |
| 2 Medium (2)                               |                    |                         |           |        |           |            |            |             |                          |     |           |        |           |            |             |             |             |
| <b>Waste management</b>                    |                    |                         |           |        |           |            |            |             |                          |     |           |        |           |            |             |             |             |
|                                            |                    | Data quality for amount |           |        |           |            |            |             | LCC data quality         |     |           |        |           |            |             |             |             |
|                                            |                    | 2                       | 1         | 3      | 2         | 2          |            |             | 2                        | 1   | 3         | 2      | 2         |            |             |             |             |
| Waste                                      | Source of data for | Age                     | Geography | Source | Completer | Reproducit | DQA for ar | Qualitative | Source of LCI data       | Age | Geography | Source | Completer | Reproducit | DQA for LCI | Qualitative | Process DQA |
| Wastewater (to wastewater treatment plant) | Manufacturer       | 3                       | 2         | 3      | 3         | 3          | 29         | High        | Scottish Water (201)     | 3   | 3         | 1      | 1         | 1          | 16          | Medium      | Medium 2    |
| Aluminium (to landfill)                    | Literature         | 3                       | 2         | 2      | 3         | 3          | 26         | High        | WRAP (2010)              | 3   | 3         | 1      | 1         | 1          | 16          | Medium      | Medium 2    |
| <b>Subsystem DQA</b>                       |                    |                         |           |        |           |            |            |             |                          |     |           |        |           |            |             |             |             |
| 2 Medium (2)                               |                    |                         |           |        |           |            |            |             |                          |     |           |        |           |            |             |             |             |

Note: Transport costs are assumed to be included in the material costs therefore Transport has not been considered as a separate life cycle stage in the LCC analysis.

**DQA for system**  
 $72(2) + 8(2) + 20(2) + 1(2) = 202$  (Medium)

| Key                        |  | Life cycle stage (subsystem) contribution to total environmental impacts |              |
|----------------------------|--|--------------------------------------------------------------------------|--------------|
|                            |  | Life cycle                                                               | Contribution |
| Subsystem                  |  | Raw materials                                                            | 72%          |
| Weighting factor           |  | Packaging                                                                | 8%           |
| Data quality for process   |  | Manufacturing                                                            | 20%          |
| Data quality for subsystem |  | Waste management                                                         | 1%           |
| Data quality for system    |  | Total                                                                    | 100%         |



**Table S9 Beer in steel cans**

| <b>Raw materials</b>                       |                    |     |           |        |           |            |            |             |                          |                  |           |        |           |            |             |             |             |
|--------------------------------------------|--------------------|-----|-----------|--------|-----------|------------|------------|-------------|--------------------------|------------------|-----------|--------|-----------|------------|-------------|-------------|-------------|
| Data quality for amount                    |                    |     |           |        |           |            |            |             |                          | LCC data quality |           |        |           |            |             |             |             |
|                                            |                    | 2   | 1         | 3      | 2         | 2          |            |             |                          | 2                | 1         | 3      | 2         | 2          |             |             |             |
| Raw materials                              | Source of data for | Age | Geography | Source | Completer | Reproducit | DQA for ar | Qualitative | Source of LCI data       | Age              | Geography | Source | Completer | Reproducit | DQA for LCI | Qualitative | Process DQA |
| Light fuel oil                             | Manufacturer       | 3   | 2         | 3      | 3         | 3          | 29         | High        | OECD (2007)              | 2                | 1         | 1      | 1         | 1          | 12          | Medium      | Medium 2    |
| Water                                      | Manufacturer       | 3   | 2         | 3      | 3         | 3          | 29         | High        | United Utilities (2010)  | 3                | 3         | 1      | 1         | 1          | 16          | Medium      | Medium 2    |
| Sodium hydroxide (50%)                     | Manufacturer       | 3   | 2         | 3      | 3         | 3          | 29         | High        | IChemE (2002)            | 3                | 1         | 1      | 1         | 1          | 14          | Medium      | Medium 2    |
| Phosphoric acid (75%)                      | Manufacturer       | 3   | 2         | 3      | 3         | 3          | 29         | High        | ICIS (2010)              | 3                | 1         | 1      | 1         | 1          | 14          | Medium      | Medium 2    |
| Sulphuric acid (63% in solution)           | Manufacturer       | 3   | 2         | 3      | 3         | 3          | 29         | High        | ICIS (2010)              | 3                | 1         | 1      | 1         | 1          | 14          | Medium      | Medium 2    |
| Carbon dioxide, liquid                     | Manufacturer       | 3   | 2         | 3      | 3         | 3          | 29         | High        | Confidential (2009)      | 3                | 1         | 1      | 1         | 1          | 14          | Medium      | Medium 2    |
| Barley                                     | Manufacturer       | 3   | 2         | 3      | 3         | 3          | 29         | High        | Indexmundi (2011)        | 3                | 1         | 1      | 1         | 1          | 14          | Medium      | Medium 2    |
| Water (barley product)                     | Ecoinvent (2010)   | 3   | 2         | 3      | 3         | 3          | 29         | High        | United Utilities (2010)  | 3                | 3         | 1      | 1         | 1          | 16          | Medium      | Medium 2    |
| <b>Subsystem DQA</b>                       |                    |     |           |        |           |            |            |             |                          |                  |           |        |           |            |             |             |             |
| 2 Medium (2)                               |                    |     |           |        |           |            |            |             |                          |                  |           |        |           |            |             |             |             |
| <b>Packaging</b>                           |                    |     |           |        |           |            |            |             |                          |                  |           |        |           |            |             |             |             |
| Data quality for amount                    |                    |     |           |        |           |            |            |             |                          | LCC data quality |           |        |           |            |             |             |             |
|                                            |                    | 2   | 1         | 3      | 2         | 2          |            |             |                          | 2                | 1         | 3      | 2         | 2          |             |             |             |
| Primary packaging type                     | Source of data for | Age | Geography | Source | Completer | Reproducit | DQA for ar | Qualitative | Source of LCI data       | Age              | Geography | Source | Completer | Reproducit | DQA for LCI | Qualitative | Process DQA |
| Steel can                                  | CCaLC (2010)       | 3   | 3         | 3      | 3         | 3          | 30         | High        | LME (2011)/Letsrecycle   | 3                | 1         | 1      | 1         | 1          | 14          | Medium      | Medium 2    |
| Aluminium (can ends)                       | CCaLC (2010)       | 3   | 3         | 3      | 3         | 3          | 30         | High        | LME (2011)/Letsrecycle   | 3                | 1         | 1      | 1         | 1          | 14          | Medium      | Medium 2    |
| <b>Subsystem DQA</b>                       |                    |     |           |        |           |            |            |             |                          |                  |           |        |           |            |             |             |             |
| 2 Medium (2)                               |                    |     |           |        |           |            |            |             |                          |                  |           |        |           |            |             |             |             |
| <b>Manufacturing</b>                       |                    |     |           |        |           |            |            |             |                          |                  |           |        |           |            |             |             |             |
| Data quality for amount                    |                    |     |           |        |           |            |            |             |                          | LCC data quality |           |        |           |            |             |             |             |
|                                            |                    | 2   | 1         | 3      | 2         | 2          |            |             |                          | 2                | 1         | 3      | 2         | 2          |             |             |             |
| Electricity                                | Source of data for | Age | Geography | Source | Completer | Reproducit | DQA for ar | Qualitative | Source of LCI data       | Age              | Geography | Source | Completer | Reproducit | DQA for LCI | Qualitative | Process DQA |
| Electricity (UK grid, medium voltage)      | Manufacturer       | 3   | 2         | 3      | 3         | 3          | 29         | High        | Electricityprices.org.uk | 3                | 3         | 1      | 1         | 1          | 16          | Medium      | Medium 2    |
| <b>Subsystem DQA</b>                       |                    |     |           |        |           |            |            |             |                          |                  |           |        |           |            |             |             |             |
| 2 Medium (2)                               |                    |     |           |        |           |            |            |             |                          |                  |           |        |           |            |             |             |             |
| <b>Waste management</b>                    |                    |     |           |        |           |            |            |             |                          |                  |           |        |           |            |             |             |             |
| Data quality for amount                    |                    |     |           |        |           |            |            |             |                          | LCC data quality |           |        |           |            |             |             |             |
|                                            |                    | 2   | 1         | 3      | 2         | 2          |            |             |                          | 2                | 1         | 3      | 2         | 2          |             |             |             |
| Waste                                      | Source of data for | Age | Geography | Source | Completer | Reproducit | DQA for ar | Qualitative | Source of LCI data       | Age              | Geography | Source | Completer | Reproducit | DQA for LCI | Qualitative | Process DQA |
| Wastewater (to wastewater treatment plant) | Manufacturer       | 3   | 2         | 3      | 3         | 3          | 29         | High        | Scottish Water (2011)    | 3                | 3         | 1      | 1         | 1          | 16          | Medium      | Medium 2    |
| Steel (to landfill)                        | Literature         | 3   | 2         | 2      | 3         | 3          | 26         | High        | WRAP (2010)              | 3                | 3         | 1      | 1         | 1          | 16          | Medium      | Medium 2    |
| <b>Subsystem DQA</b>                       |                    |     |           |        |           |            |            |             |                          |                  |           |        |           |            |             |             |             |
| 2 Medium (2)                               |                    |     |           |        |           |            |            |             |                          |                  |           |        |           |            |             |             |             |

Note: Transport costs are assumed to be included in the material costs therefore Transport has not been considered as a separate life cycle stage in the LCC analysis.

**DQA for system**  
 $68(2) + 13(2) + 18(2) + 1(2) = 200$  (Medium)

Life cycle stage (subsystem) contribution to total environmental impacts

| Key                        | Life cycle       | Contribution |
|----------------------------|------------------|--------------|
| Subsystem                  | Raw materials    | 68%          |
| Weighting factor           | Packaging        | 13%          |
| Data quality for process   | Manufacturing    | 18%          |
| Data quality for subsystem | Waste management | 1%           |
| Data quality for system    | Total            | 100%         |
